# Supplementary material for: Quantitative Modeling of Escherichia coli Chemotactic Motion in Environments Varying in Space and Time
Source: PubMed Central journal article supplement (PMC2851563; doi:10.1371/journal.pcbi.1000735), 2010-04-08
Supplement: pcbi.1000735.s002.pdf [file pcbi.1000735.s002.pdf]

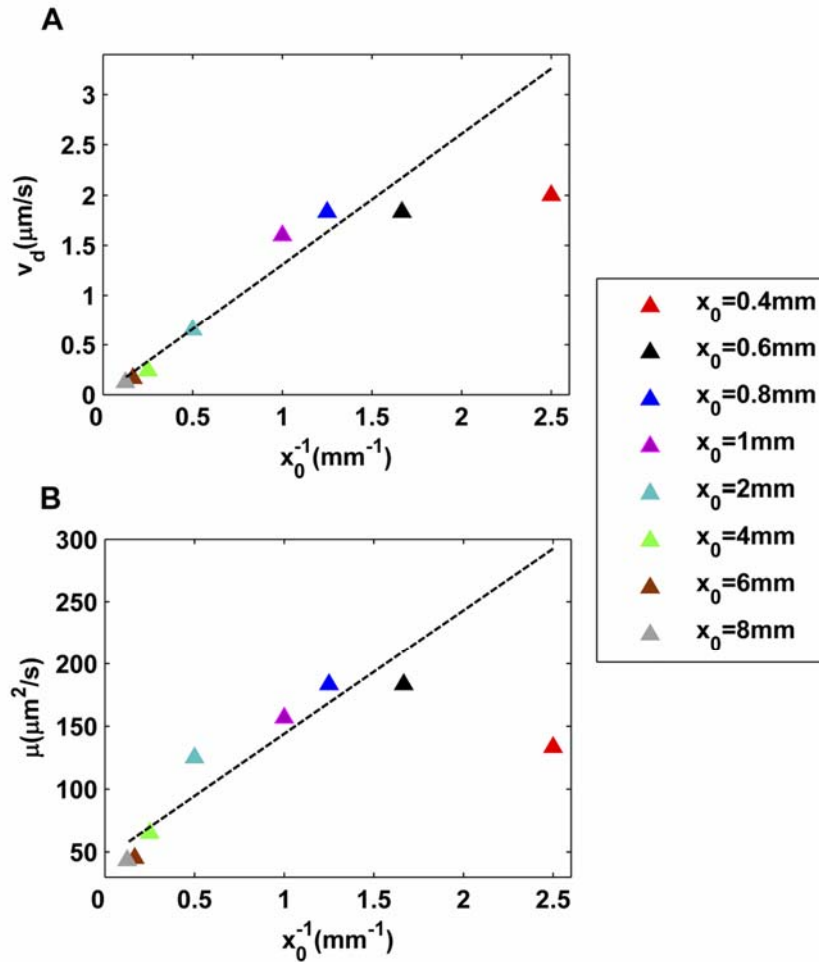

**Figure S2 Chemotactic drift velocity and diffusion constant in exponential ligand concentration gradients.** In exponential gradients both the center of mass  $\langle x \rangle$  and the mean standard deviation of cell locations  $\langle x^2 \rangle$  increase linearly with time. So we plotted drift velocity  $v_d = d \langle x \rangle / dt$  and diffusion constant  $\mu = d \langle x^2 \rangle / dt$  at different gradient  $G$ . They have the same transition gradient  $G_C$  which depends on the adaptation rate as explained in the text.
