# Supplementary material for: Quantitative Modeling of Escherichia coli Chemotactic Motion in Environments Varying in Space and Time
Source: PubMed Central journal article supplement (PMC2851563; doi:10.1371/journal.pcbi.1000735), 2010-04-08
Supplement: pcbi.1000735.s003.pdf [file pcbi.1000735.s003.pdf]

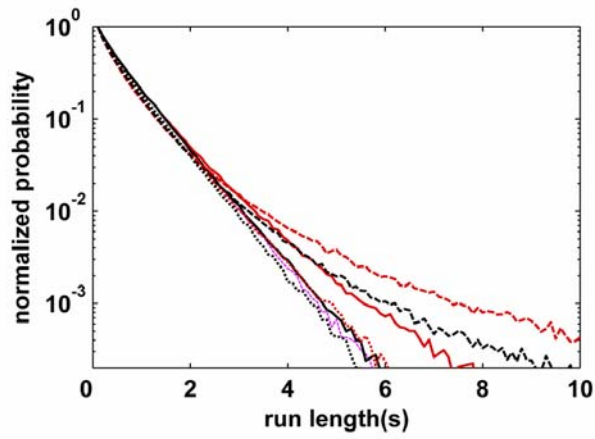

**Figure S3 Single cell behaviors in exponential gradient.** The same as Figure 4B but we added the statistics for  $x_0 = 2mm$  (dashed line) and  $x_0 = 8mm$  (dotted line). Quantitatively, the run time distributions depend on the details of the gradient. The experimental results probably correspond to a Gaussian profile.
